# Supplementary material for: Twin-Arginine Translocation System in Helicobacter pylori: TatC, but Not TatB, Is Essential for Viability
Source: PubMed Central journal article supplement — mBio. 2014 Jan 21;5(1):e01016-13. doi: 10.1128/mBio.01016-13 (PMC3903283; doi:10.1128/mbio.01016-13), 2014-01-21
Supplement: mbo001141717sf02.pdf [file mbo001141717sf02.pdf]

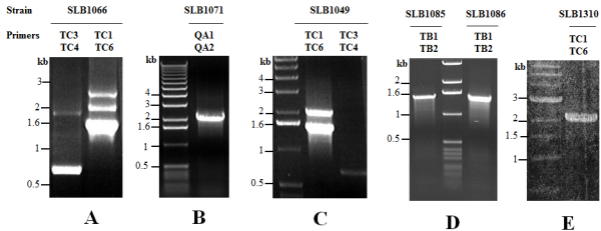

Figure S2

| <u>Panel</u> | <u>Template</u> | <u>Expected genotype</u>    | <u>Primers</u> | <u>PCR product size in kb (specificity)</u>                          | <u>Conclusion*</u> |
|--------------|-----------------|-----------------------------|----------------|----------------------------------------------------------------------|--------------------|
| A            | SLB1066         | <i>tatC::aphA3</i>          | TC3-TC4        | 0.72 (WT <i>tatC</i> ), 1.97 ( <i>tatC::aphA3</i> )                  | Single HR          |
|              |                 |                             | TC1-TC6        | 1.56 (WT <i>tatC</i> ); 2.71 ( <i>tatC::aphA3</i> )                  | Single HR          |
| B            | SLB1071         | <i>queA::aphA3</i>          | QA1-QA         | 2.19 ( <i>queA::aphA3</i> )                                          | Double HR          |
| C            | SLB1049         | $\Delta$ <i>tatC::aphA3</i> | TC1-TC6        | 1.56 (WT <i>tatC</i> ), 2.10 ( $\Delta$ <i>tatC::aphA3</i> )         | Single HR          |
|              |                 |                             | TC3-TC4        | 0.72 (WT <i>tatC</i> ), (no product if $\Delta$ <i>tatC::aphA3</i> ) | Single HR          |
| D            | SLB1085         | <i>tatB::cat</i> (I)        | TB1-TB2        | 1.52 ( <i>tatB::cat</i> )                                            | Double HR          |
|              | SLB1086         | <i>tatB::cat</i> (II)       | TB1-TB2        | 1.52 ( <i>tatB::cat</i> )                                            | Double HR          |
| E            | SLB1310         | $\Delta$ <i>tatC::aphA3</i> | TC1-TC6        | 2.10 ( $\Delta$ <i>tatC::aphA3</i> )                                 | Double HR          |

\*HR: homologous recombination.
